# Supplementary material
Source: PubMed Central journal article supplement (PMC5319731)
Supplement: NIHMS843544-supplement-004662_-_Supplemental_Material.pdf [file NIHMS843544-supplement-004662_-_Supplemental_Material.pdf]

SUPPLEMENTAL MATERIAL

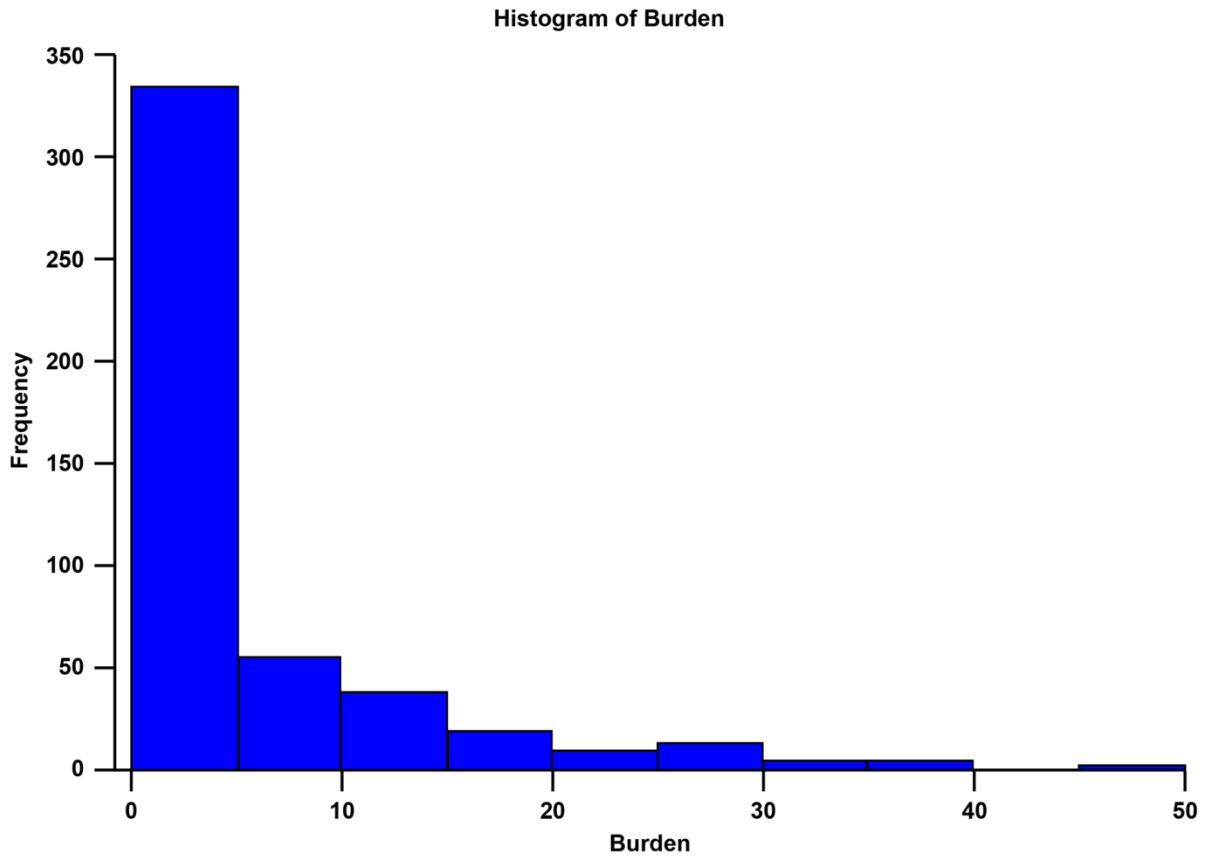

**Supplemental Figure:** Histogram of PVC burden among the idiopathic VA cohort. Majority of the patients had fairly low arrhythmia burden.
